# Supplementary material for: Catalytic investigation of hyaluronic acid-stabilized Ag nanoparticles as non-toxic nanocatalysts in the oxidation of morin
Source: Royal Society of Chemistry journal article supplement (doi:10.1039/d3nj05411j), 2024-01-01
Supplement: d3nj05411j2.pdf [file d3nj05411j2.pdf]

## Supplementary Information

### Catalytic investigation of hyaluronic acid stabilized Ag nanoparticles as non-toxic nanocatalysts in the oxidation of morin

M. Deniz Yilmaz,<sup>ab\*</sup> Nezahat Gokce Ozsamur,<sup>bc</sup> Sundus Erbas-Cakmak<sup>bc</sup>

<sup>a</sup> *Department of Basic Sciences, Faculty of Engineering, Necmettin Erbakan University, 42140 Konya, Türkiye*

<sup>b</sup> *BITAM-Science and Technology Research and Application Center, Necmettin Erbakan University, 42140 Konya, Türkiye.*

<sup>c</sup> *Department of Molecular Biology and Genetics, Faculty of Science, Necmettin Erbakan University, 42090 Konya, Türkiye*

\*Corresponding author: [deniz.yilmaz@erbakan.edu.tr](mailto:deniz.yilmaz@erbakan.edu.tr); [yilmazdnz@gmail.com](mailto:yilmazdnz@gmail.com)

#### Table of Contents

|                                                                                                                   |   |
|-------------------------------------------------------------------------------------------------------------------|---|
| 1. The concentration dependent absorption spectra of HA-AgNPs .....                                               | 2 |
| 2. FTIR spectra of Hyaluronic acid and HA-AgNPs .....                                                             | 2 |
| 3. UV-vis spectra of 1,3-diphenylisobenzofuran (DPBF) in the presence and absence of HA-AgNPs.....                | 3 |
| 4. Comparison of HA-AgNPs with other nanosystems used for the oxidation of morin reported in the literature ..... | 4 |
| 5. Mass spectrum of degradation products of morin.....                                                            | 5 |
| 6. Real-time video of the oxidation of morin in the presence of H <sub>2</sub> O <sub>2</sub> and HA-AgNPs.....   | 5 |

## 1. The concentration dependent absorption spectra of HA-AgNPs

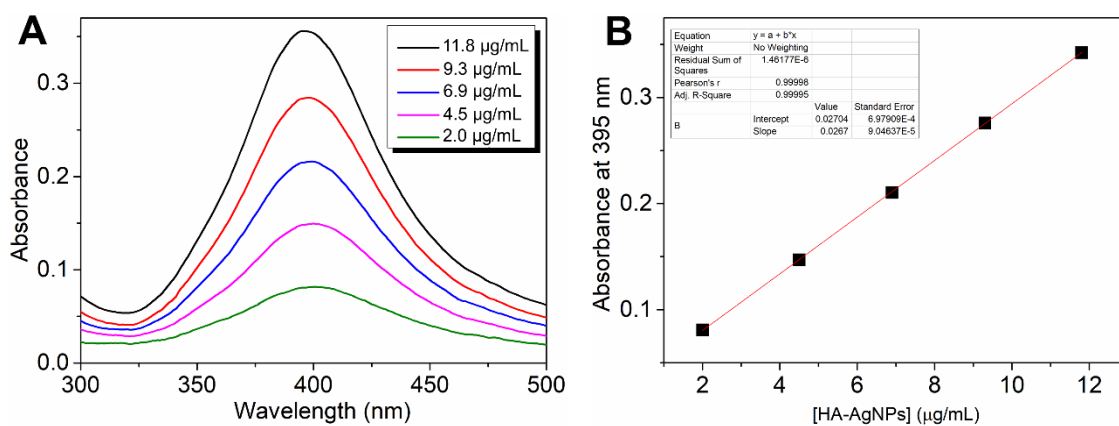

**Fig. S1** (A) The concentration dependent UV-vis spectra of HA-AgNPs in H<sub>2</sub>O and (B) the plot of the absorbance of HA-AgNPs at 395 nm versus the concentration.

## 2. FTIR spectra of Hyaluronic acid and HA-AgNPs

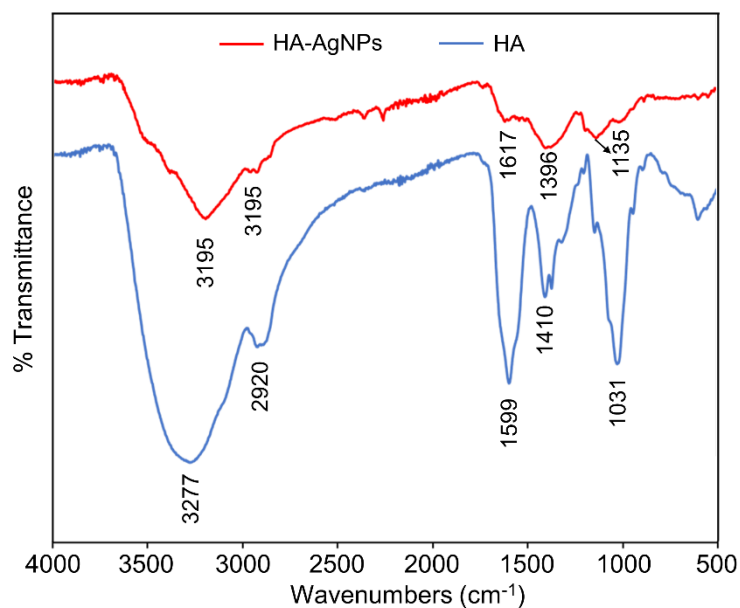

**Fig. S2** FTIR spectra of HA and HA-AgNPs.

### 3. UV-vis spectra of 1,3-diphenylisobenzofuran (DPBF) in the presence and absence of HA-AgNPs

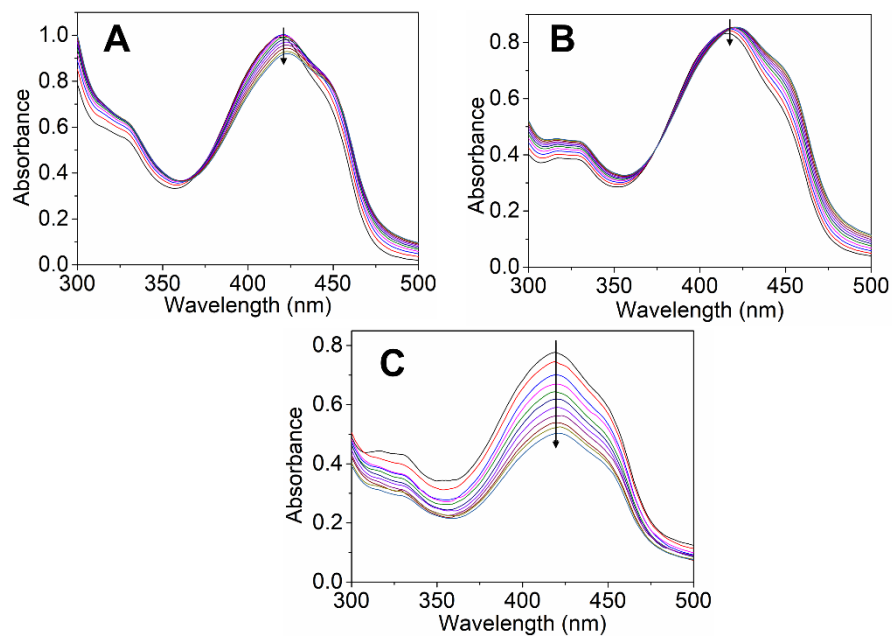

**Fig. S3** UV-vis spectra of DPBF in 10 mM carbonate buffer at pH 10 at 298 K (A) in the presence of  $\text{H}_2\text{O}_2$  (196 mM) and absence of HA-AgNPs; (B) in the presence of HA-AgNPs (4.5  $\mu\text{g}/\text{mL}$ ) and absence of  $\text{H}_2\text{O}_2$ ; (C) in the presence of both HA-AgNPs (4.5  $\mu\text{g}/\text{mL}$ ) and  $\text{H}_2\text{O}_2$  (196 mM).

#### 4. Comparison of HA-AgNPs with other nanosystems used for the oxidation of morin reported in the literature

**Table S1.** Comparison of nanocatalysts in the oxidation of morin

| Catalyst                        | $k_{app}$<br>( $s^{-1} \times 10^{-2}$ ) | Catalyst<br>concentration | Morin<br>concentration | H <sub>2</sub> O <sub>2</sub><br>concentration | Cytotoxicity, IC <sub>50</sub> | Reaction<br>time | Ref          |
|---------------------------------|------------------------------------------|---------------------------|------------------------|------------------------------------------------|--------------------------------|------------------|--------------|
| HA-AgNPs                        | 1.01                                     | 4.5 $\mu$ g/mL            | 150 $\mu$ M            | 196 mM                                         | > 40 $\mu$ g/mL                | 250 s            | This<br>work |
| Que-AgNPs                       | 0.14                                     | 16.6 $\mu$ g/mL           | 100 $\mu$ M            | 490 mM                                         | 47.36 $\mu$ g/mL               | 1200 s           | 24           |
| AgDENs                          | 0.0151                                   | 490 nM                    | 100 $\mu$ M            | 24 mM                                          | na                             | 7000 s           | 21           |
| CH-AuNPs                        | 0.12                                     | 2.5 nM                    | 100 $\mu$ M            | 0.49 mM                                        | > 6.8 nM                       | 1800 s           | 15           |
| Pt <sub>20</sub> @BSA           | 0.80                                     | 600 nM                    | 125 $\mu$ M            | 10 mM                                          | > 2 $\mu$ M                    | 1200 s           | 12           |
| MnO <sub>x</sub> NP             | 0.2                                      | 770 $\mu$ g/mL            | 100 $\mu$ M            | 10 mM                                          | na                             | 1800 s           | 4            |
| Pd <sub>55</sub> -DENs          | 0.384                                    | 300 nM                    | 900 $\mu$ M            | 50 mM                                          | na                             | 1800 s           | 10           |
| Co <sup>2+</sup> @PEM-<br>MSNPs | na                                       | 133 $\mu$ g/mL            | 160 $\mu$ M            | 980 mM                                         | na                             | 300 s            | 13           |

## 5. Mass spectrum of degradation products of morin

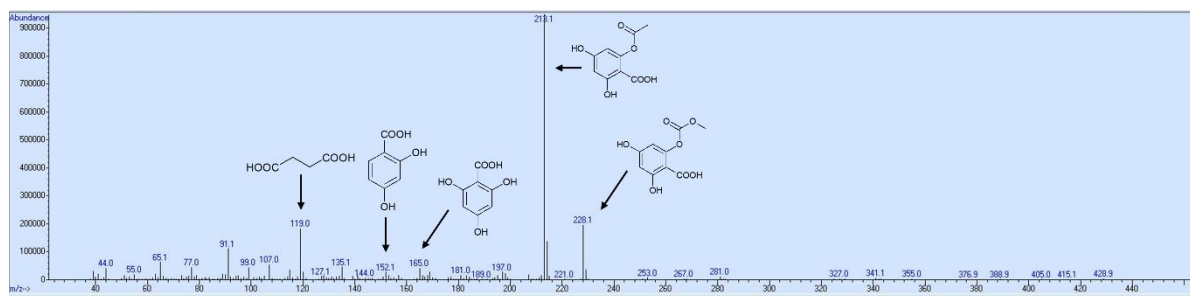

**Fig. S4** Mass spectrum of morin after the oxidation by HA-AgNPs in the presence of H<sub>2</sub>O<sub>2</sub>, collected by GC-MS.

## 6. Real-time video of the oxidation of morin in the presence of H<sub>2</sub>O<sub>2</sub> and HA-AgNPs

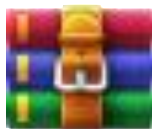

Video S1.rar
